# Supplementary material for: Thermally resistant unsaturated polyester resin with low dielectric loss based on special benzyl alcohol terminated hyperbranched polysiloxane for producing high efficiency motors using vacuum pressure impregnation technique
Source: Royal Society of Chemistry journal article supplement (doi:10.1039/c5ra23768h), 2016-01-01
Supplement: c5ra23768h1.pdf [file c5ra23768h1.pdf]

**Electronic Supplementary Information**

**Thermally Resistant Unsaturated Polyester Resin with Low Dielectric Loss Based on Special Benzyl Alcohol Terminated Hyperbranched Polysiloxane for Producing High Efficiency Motors Using Vacuum Pressure Impregnation Technique**

Cheng Zhou, Guozheng Liang\* and Aijuan Gu\*

State and Local Joint Engineering Laboratory for Novel Functional Polymeric

Materials

Jiangsu Key Laboratory of Advanced Functional Polymer Design and Application

College of Chemistry, Chemical Engineering and Materials Science

Soochow University, Suzhou 215123, China

---

\* Corresponding author. Tel: +86 512 65880967. Fax: +86 512 65880089. E-mail address: [lgzheng@suda.edu.cn](mailto:lgzheng@suda.edu.cn) (Guozheng Liang), or, [ajgu@suda.edu.cn](mailto:ajgu@suda.edu.cn) (Aijuan Gu).

Free volume is an important parameter for describing the structure of a polymer, which has great influences on the properties of the polymer. PALS technique is an effective method to evaluate the free volume of polymers, by which two important factors, o-Ps lifetime ( $\tau_3$ ) and o-Ps intensity ( $I_3$ ), can be obtained. The  $\tau_3$  and  $I_3$  values of Vi-HPSi/UP resins are shown in Fig.S1, it can be seen that with the addition of Vi-HPSi into UP resin, both  $\tau_3$  and  $I_3$  reduce initially and then gradually increased with the content of Vi-HPSi increase. In detail,  $\tau_3$  reduces incipiently and reaches the minimum value (1.7558 ns) at 5 wt% Vi-HPSi, about 0.96 times that of UP resin (1.8324 ns). Then  $\tau_3$  increases gradually and reaches 1.8152 ns at 20 wt% Vi-HPSi. While  $I_3$  reaches the minimum value (23.17 %) at 10 wt% Vi-HPSi, about 0.88 times that of UP resin (26.40 %), then increases gradually and reaches 25.16 %.

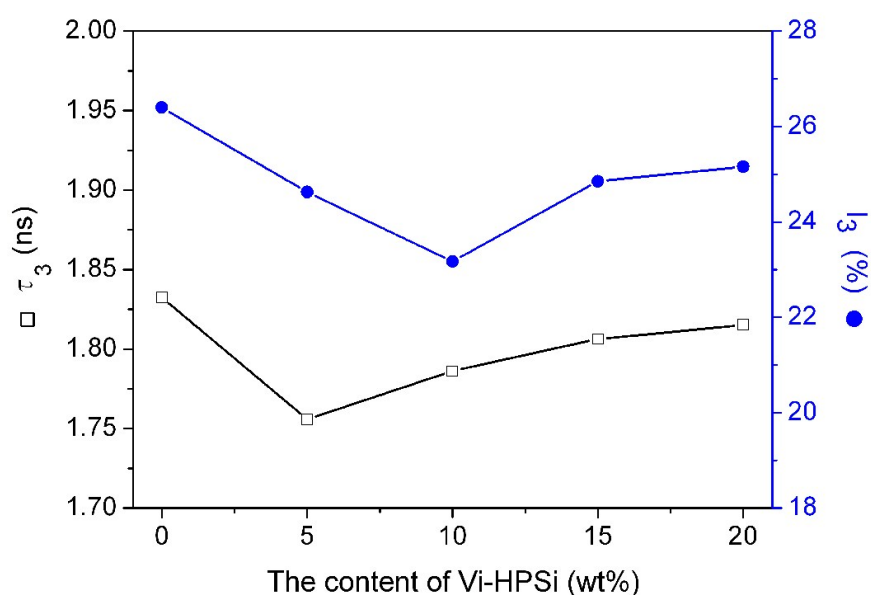

Fig. S1  $\tau_3$  and  $I_3$  values of Vi-HPSi/UP resins with different Vi-HPSi contents

It is known that  $\tau_3$  directly reflects the sizes of the free volume cavities and  $I_3$  relates to the number of free volume sites in a material. From  $\tau_3$  and  $I_3$ , two other visual and useful parameters, the average volume of free cavities ( $V_h$ ) and fractional free volume ( $f_{app}$ ), can be calculated. <sup>1,2</sup>

## References

- [1] R. C. McDonald, D. W. Gidley, T. Sanderson and R. S. Vallery, *J. Membrane. Sci.*, 2009, 89–92
- [2] M. F. Zeng, X. D. Sun, Y. Wang, M. Z. Zhang, Y. M. Shen, B. Y. Wang and C. Z. Qi, *Polym. Adv. Techno.*, 2008, 19, 1664–1671.
